# Supplementary material for: A prognostic glycolysis-related gene signature in osteosarcoma: implications for metabolic programming, immune microenvironment, and drug response
Source: PeerJ. 2025 Apr 29;13:e19369. doi: 10.7717/peerj.19369 (PMC12047218; doi:10.7717/peerj.19369)
Supplement: Supplemental Information 1 [file peerj-13-19369-s001.xlsx]

## Sheet: Sheet1
Target genes	Sample	GAPDH	CT value	ΔCt
CHPF	hFOB1.19	17.1723	21.1205	3.94824
		17.5855	21.4644	3.87894
		17.6004	21.6536	4.0532
	MG63	17.6622	22.4508	4.78859
		17.8172	21.9977	4.18054
		18.0977	22.2626	4.16493
	Saos2	18.7167	19.9785	1.26186
		19.58	20.2265	0.646553
		19.1311	19.9706	0.839481
	U2OS	18.8235	21.8263	3.0028
		18.4051	21.9186	3.51351
		18.8962	21.8821	2.98586
	HOS	16.1999	19.6772	3.4773
		15.8745	19.6419	3.76736
		15.9547	19.8685	3.91375
	hFOB1.19 group avarage	17.4527	21.4129	3.96013
	MG63 group average	17.859	22.2371	4.37802
	Saos2 group average	19.1426	23.1743	4.03166
	U2OS group average	18.7083	22.7057	3.99747
	HOS group average	16.0097	20.0971	4.08735
RRAGD	hFOB1.19	17.1723	27.7971	10.6248
		17.5855	27.9619	10.3764
		17.6004	28.0309	10.4305
	MG63	17.6622	25.4009	7.73871
		17.8172	25.3819	7.5647
		18.0977	25.6233	7.52563
	Saos2	18.7167	22.1812	3.46458
		19.58	22.0028	2.42281
		19.1311	22.1935	3.06236
	U2OS	18.8235	24.2643	5.44082
		18.4051	24.0002	5.59508
		18.8962	24.2356	5.33939
	HOS	16.1999	19.6307	3.43082
		15.8745	19.6557	3.78118
		15.9547	19.8421	3.88739
	hFOB1.19 group avarage	17.4527	27.93	10.4772
	MG63 group average	17.859	28.868	11.0089
	Saos2 group average	19.1426	29.7457	10.6031
	U2OS group average	18.7083	29.4186	10.7104
	HOS group average	16.0097	27.0075	10.9978
TRP	hFOB1.19	17.1723	21.3084	4.1361
		17.5855	21.5955	4.01005
		17.6004	21.7777	4.17731
	MG63	17.6622	22.5474	4.88516
		17.8172	22.7764	4.95924
		18.0977	22.8092	4.71155
	Saos2	18.7167	24.2422	5.52559
		19.58	24.4895	4.9095
		19.1311	24.3137	5.18254
	U2OS	18.8235	25.4512	6.62771
		18.4051	25.2384	6.83336
		18.8962	25.2007	6.30448
	HOS	16.1999	22.4709	6.27103
		15.8745	22.2238	6.34928
		15.9547	22.1451	6.19034
	hFOB1.19 group avarage	17.4527	21.5605	4.10782
	MG63 group average	17.859	21.7655	3.90645
	Saos2 group average	19.1426	22.766	3.62339
	U2OS group average	18.7083	22.566	3.85771
	HOS group average	16.0097	20.0709	4.06117
VCAN	hFOB1.19	17.1723	23.5207	6.34839
		17.5855	23.8593	6.27377
		17.6004	23.9104	6.31004
	MG63	17.6622	23.1027	5.44051
		17.8172	23.6408	5.82365
		18.0977	23.7136	5.61591
	Saos2	18.7167	25.2296	6.51296
		19.08	25.684	6.60399
		19.1311	25.7071	6.57595
	U2OS	18.8235	27.744	8.9205
		18.4051	27.9642	9.55915
		18.8962	27.6952	8.79893
	HOS	16.1999	24.4298	8.2299
		15.8745	24.5194	8.64482
		15.9547	24.519	8.56431
	hFOB1.19 group avarage	17.4527	23.7635	6.31074
	MG63 group average	17.859	24.816	6.95695
	Saos2 group average	18.9759	25.5402	6.5643
	U2OS group average	18.7083	27.8011	9.09286
	HOS group average	16.0097	24.4894	8.47967
UCP2	hFOB1.19	17.1723	18.872	1.69975
		17.5855	18.981	1.39556
		17.6004	18.885	1.28458
	MG63	17.6622	20.5643	2.90208
		17.8172	20.7163	2.89911
		18.0977	20.7952	2.69751
	Saos2	18.7167	22.6907	3.97409
		19.58	22.7702	3.19028
		19.1311	22.5452	3.41401
	U2OS	18.8235	21.5808	2.75728
		18.4051	21.5209	3.11579
		18.8962	21.3326	2.43637
	HOS	16.1999	17.6771	1.47713
		15.8745	17.7434	1.86882
		15.9547	17.6523	1.69754
	hFOB1.19 group avarage	17.4527	18.9127	1.45996
	MG63 group average	17.859	20.6919	2.8329
	Saos2 group average	19.1426	22.6687	3.52613
	U2OS group average	18.7083	21.4781	2.76981
	HOS group average	16.0097	17.6909	1.68116
PRDX4	hFOB1.19	15.1224	16.9084	1.78608
		15.033	16.7355	1.7025
		15.2116	16.7875	1.57591
	MG63	15.9859	17.9894	2.00347
		16.1135	18.1248	2.01125
		16.0375	18.1139	2.07648
	Saos2	17.2661	19.114	1.84794
		17.8011	18.976	1.17486
		17.4575	18.9592	1.50169
	U2OS	16.7141	20.7213	4.00726
		16.7796	20.7077	3.92816
		16.8713	20.6534	3.78209
	HOS	14.1113	17.1621	3.05083
		14.0996	17.2058	3.10622
		13.9876	17.0171	3.02952
	hFOB1.19 group avarage	15.1223	16.8105	1.68816
	MG63 group average	16.0456	17.6877	1.64205
	Saos2 group average	17.5082	19.0163	1.50806
	U2OS group average	16.7883	18.1122	1.32392
	HOS group average	14.0662	15.6598	1.59367
