# Supplementary material for: A prognostic glycolysis-related gene signature in osteosarcoma: implications for metabolic programming, immune microenvironment, and drug response
Source: PeerJ. 2025 Apr 29;13:e19369. doi: 10.7717/peerj.19369 (PMC12047218; doi:10.7717/peerj.19369)
Supplement: Supplemental Information 2 [file peerj-13-19369-s002.xls]

## Sheet: Sheet1
ITEM TO CHECK	IMPORTANCE	CHECKLIST
EXPERIMENTAL DESIGN
Definition of experimental and control groups	E	Line 129-131
Number within each group	E	Line 129-131
Assay carried out by core lab or investigator's lab?	D	NA
Acknowledgement of authors' contributions	D	NA
SAMPLE
Description	E	Line119-128
Volume/mass of sample processed	D	NA
Microdissection or macrodissection	E	NA
Processing procedure	E	Line128-133
If frozen - how and how quickly?	E	NA
If fixed - with what, how quickly?	E	NA
Sample storage conditions and duration (especially for FFPE samples)	E	NA
NUCLEIC ACID EXTRACTION
Procedure and/or instrumentation	E	Line199-201
Name of kit and details of any modifications	E	Line199-209
Source of additional reagents used	D	NA
Details of DNase or RNAse treatment	E	NA
Contamination assessment (DNA or RNA)	E	NA
Nucleic acid quantification	E	Line201-207
Instrument and method	E	Line199-201
Purity (A260/A280)	D	NA
Yield	D	NA
RNA integrity method/instrument	E	Line207-209
RIN/RQI or Cq of 3' and 5' transcripts	E	NA
Electrophoresis traces	D	NA
Inhibition testing (Cq dilutions, spike or other)	E	NA
REVERSE TRANSCRIPTION
Complete reaction conditions	E	NA
Amount of RNA and reaction volume	E	NA
Priming oligonucleotide (if using GSP) and concentration	E	NA
Reverse transcriptase and concentration	E	Line214
Temperature and time	E	NA
Manufacturer of reagents and catalogue numbers	D	Line212-216
Cqs with and without RT	D*	NA
Storage conditions of cDNA	D	NA
qPCR TARGET INFORMATION
If multiplex, efficiency and LOD of each assay.	E	NA
Sequence accession number	E	NA
Location of amplicon	D	NA
Amplicon length	E	NA
In silico specificity screen (BLAST, etc)	E	NA
Pseudogenes, retropseudogenes or other homologs?	D	NA
Sequence alignment	D	NA
Secondary structure analysis of amplicon	D	NA
Location of each primer by exon or intron (if applicable)	E	NA
What splice variants are targeted?	E	NA
qPCR OLIGONUCLEOTIDES
Primer sequences	E	Table1
RTPrimerDB Identification Number	D	NA
Probe sequences	D**	NA
Location and identity of any modifications	E	NA
Manufacturer of oligonucleotides	D	NA
Purification method	D	NA
qPCR PROTOCOL
Complete reaction conditions	E	Reaction conditions were prereaction at 25°C for 5-10 min, reverse transcription at 42 °C for 30-60 min, and finally termination at 95°C for 5 min.
Reaction volume and amount of cDNA/DNA	E	The final volume was supplemented to 20µL
Primer, (probe), Mg++ and dNTP concentrations	E	Table1
Polymerase identity and concentration	E	NA
Buffer/kit identity and manufacturer	E	Line222-224
Exact chemical constitution of the buffer	D	NA
Additives (SYBR Green I, DMSO, etc.)	E	NA
Manufacturer of plates/tubes and catalog number	D	NA
Complete thermocycling parameters	E	NA
Reaction setup (manual/robotic)	D	NA
Manufacturer of qPCR instrument	E	Line223-224
qPCR VALIDATION
Evidence of optimisation (from gradients)	D	NA
Specificity (gel, sequence, melt, or digest)	E	NA
For SYBR Green I, Cq of the NTC	E	NA
Standard curves with slope and y-intercept	E	NA
PCR efficiency calculated from slope	E	NA
Confidence interval for PCR efficiency or standard error	D	NA
r2 of standard curve	E	NA
Linear dynamic range	E	NA
Cq variation at lower limit	E	NA
Confidence intervals throughout range	D	NA
Evidence for limit of detection	E	NA
If multiplex, efficiency and LOD of each assay.	E	NA
DATA ANALYSIS
qPCR analysis program (source, version)	E	NA
Cq method determination	E	Line229-231
Outlier identification and disposition	E	NA
Results of NTCs	E	NA
Justification of number and choice of reference genes	E	Line228-232
Description of normalisation method	E	Line228-232
Number and concordance of biological replicates	D	NA
Number and stage (RT or qPCR) of technical replicates	E	NA
Repeatability (intra-assay variation)	E	NA
Reproducibility (inter-assay variation, %CV)	D	NA
Power analysis	D	NA
Statistical methods for result significance	E	Line244-249
Software (source, version)	E	Line246
Cq or raw data submission using RDML	D	NA
Table 1. MIQE checklist for authors, reviewers and editors. All essential information (E) must be submitted with the manuscript. Desirable
information (D) should be submitted if available. If using primers obtained from RTPrimerDB, information on qPCR target, oligonucleotides,
protocols and validation is available from that source.
*: Assessing the absence of DNA using a no RT assay is essential when first extracting RNA. Once the sample has been validated as
RDNA-free, inclusion of a no-RT control is desirable, but no longer essential.
**: Disclosure of the probe sequence is highly desirable and strongly encouraged. However, since not all commercial pre-designed assay
vendors provide this information, it cannot be an essential requirement. Use of such assays is advised against.
